# Supplementary material for: Proteomic and Carbonylation Profile Analysis at the Critical Node of Seed Ageing in Oryza sativa
Source: Springer Nature journal article supplement (doi:10.1038/srep40611), 2017-01-17
Supplement: 41598_2017_BFsrep40611_MOESM205_ESM.pdf [file 41598_2017_BFsrep40611_MOESM205_ESM.pdf]

# **Proteomic and Carbonylation Profile Analysis at the Critical Node of Seed Ageing in *Oryza sativa***

**Guangkun Yin<sup>1+</sup>, Xia Xin<sup>1+</sup>, Shenzao Fu<sup>1,3+</sup>, Mengni An<sup>1</sup>, Shuhua Wu<sup>1</sup>, Xiaoling  
Chen<sup>1</sup>, Jinmei Zhang<sup>1</sup>, Juanjuan He<sup>1</sup>, James Whelan<sup>2\*</sup>, Xinxiong Lu<sup>1\*</sup>**

<sup>1</sup>Current Address: National Genebank, Institute of Crop Science, Chinese Academy of  
Agricultural Sciences, Beijing 100081, China

<sup>2</sup>Australian Research Council Centre of Excellence in Plant Energy Biology, School  
of Life Science, La Trobe University, Bundoora, Victoria 3083, Australia

<sup>3</sup> China National Rice Research Institute, Hangzhou 310006, China

\*Corresponding authors: E-mail: luxinxiong@caas.cn; J.Whelan@LaTrobe.edu.au.

<sup>+</sup> These authors contributed equally to this work.

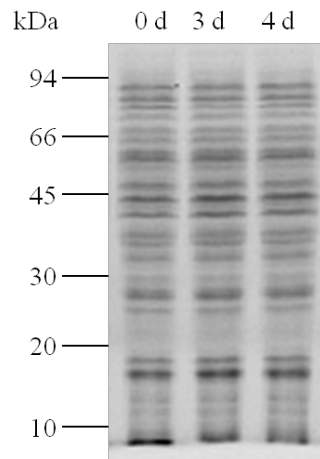

**Figure S1. SDS-PAGE analysis of protein from 0 d, 3 d and 4 d aged rice seeds after imbibition for 48 h.** Total 10  $\mu\text{g}$  protein was separated by 12% sodium dodecyl sulfate polyacrylamide gel electrophoresis.

**S1 table. List of genes used in real-time PCR.**

| Gene name                    | Accession No.  | Gene description                                                                                  |
|------------------------------|----------------|---------------------------------------------------------------------------------------------------|
| <i>MDH1</i>                  | NP_001064860.1 | malate dehydrogenase 1                                                                            |
| <i>SDH1</i>                  | NP_001058845.1 | Succinate dehydrogenase [ubiquinone] flavoprotein subunit, mitochondrial                          |
| <i><math>\beta</math>ATP</i> | NP_001043900.1 | ATP synthase, H <sup>+</sup> transporting, mitochondrial F <sub>1</sub> complex, beta polypeptide |
| <i>PDC1</i>                  | NC_029260.1    | Pyruvate decarboxylase 1                                                                          |
| <i>6PGD1</i>                 | NC_029261.1    | 6-phosphogluconate dehydrogenase 1                                                                |
| <i>APX1</i>                  | NP_001049769.1 | L-ascorbate peroxidase 1                                                                          |
| <i>UBQ5</i>                  | AK062354       | Ubiquitin 5                                                                                       |
